# Supplementary material
Source: Springer Nature journal article supplement (https://www.springermedizin.de/resource/supplementary/12877_2011_744_MOESM2_ESM.pdf/9440242)

Patients **admitted** to post-acute rehabilitation unit over a 6-month period (N=410)

**Patients excluded** (N=79)

- Cognitively impaired (MMSE score <20) (N=57)
- Considered too ill to participate (N=14)
- Age < 65 years (N=2)
- Did not speak French (N=6)

- Eligibility could not be determined (N=26)

Patients **eligible** (N=305)

- Refused to participate (N=97)

Patients **enrolled** (N=208)

- Patient left the unit before the SDAT interview could be performed (N=5)

**Final sample** (N=203)

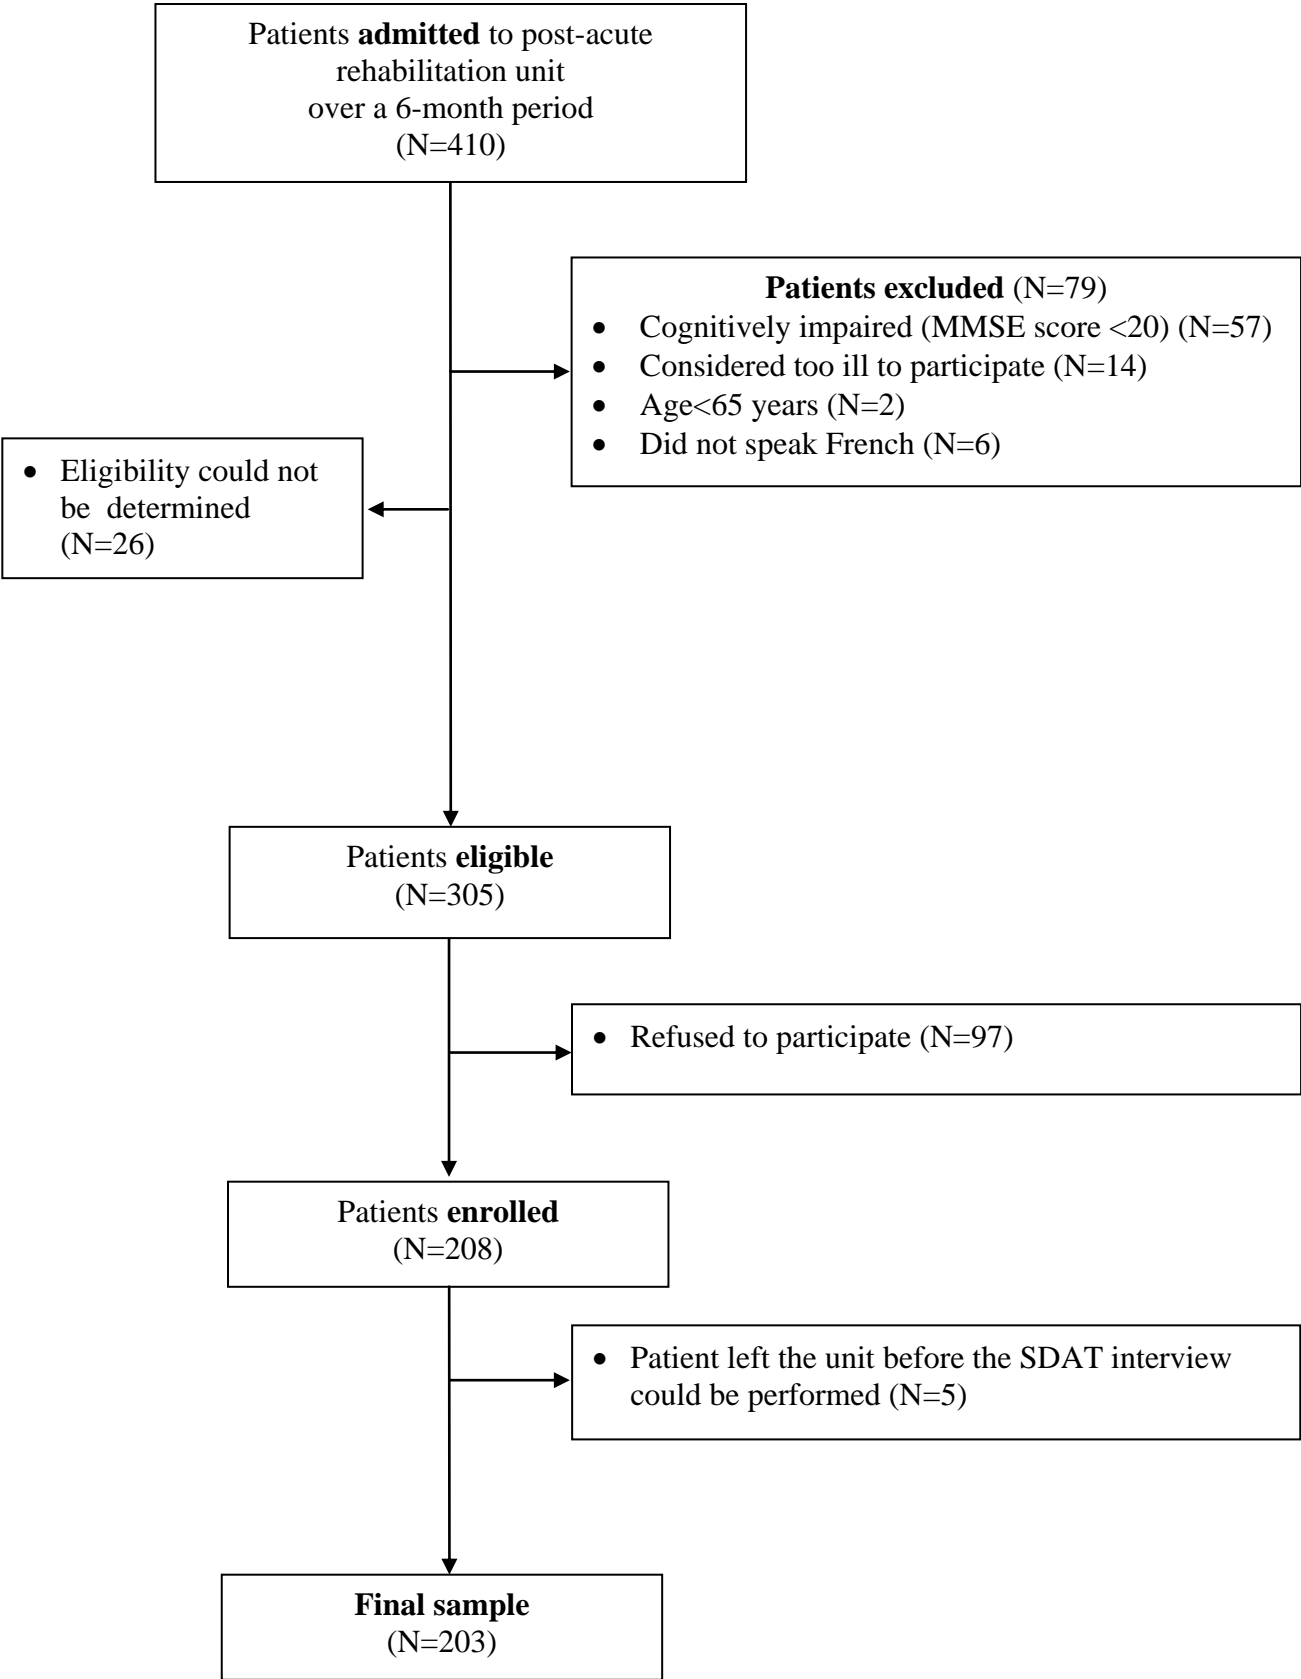

Supplement: MOESM2 [file 9440242]
